# Supplementary material for: Combined Treatment with Herbal Medicine and Drug Ameliorates Inflammation and Metabolic Abnormalities in the Liver of an Amyotrophic Lateral Sclerosis Mouse Model
Source: MDPI journal article supplement (doi:10.3390/antiox11010173), 2022-01-17
Supplement: s1 [file s1]

**Table S1. Primers for quantitative reverse transcription PCR.**

| Name                           | Primer and sequence (5'-3')                                         |
|--------------------------------|---------------------------------------------------------------------|
| <i>CYP1A2</i>                  | Forward- CATCACAAGTGCCCTGTTCAAGC<br>Reverse- AATGCTCCAGGTGATGGCTGTG |
| <i>CYP3A4</i>                  | Forward- CTGAGCTTTCTCAGTGTCTGTG<br>Reverse- GATCCCATGAGAAACGGTGAAG  |
| <i>IL-1<math>\beta</math></i>  | Forward- TCTATACCTGTCCTGTGTAATG<br>Reverse- GCTTGTGCTCTGCTTGTG      |
| <i>TNF-<math>\alpha</math></i> | Forward- GTGGAAGTGGCAGAAGAG<br>Reverse- AATGAGAAGAGGCTGAGAC         |
| <i>IL-6</i>                    | Forward- CCCCAATTTCCAATGCTCTCC<br>Reverse- CGCACTAGGTTTGCCGAGTA     |
| <i>Aco1</i>                    | Forward- CCATCCGTGATGTTAGGAGCAG<br>Reverse- GACAGGTAAGGCATGACTCCAC  |
| <i>Aco2</i>                    | Forward- ACTGTGGCAGAGAAGGAAGGCT<br>Reverse- CAATGCCTGCTTAGCCACAGCT  |
| <i>Mdh1</i>                    | Forward- TTCTGGACGGTGTCTGATGGA<br>Reverse- TAGGACAGCCACATCCAGGTCT   |
| <i>Mdh2</i>                    | Forward- TCACTCCTGCTGAAGAACAGCC<br>Reverse- CCTTTGAGGCAATCTGGCAACTG |
| <i>Pygl</i>                    | Forward- GGCAGAAGTGGTGAACAATGACC<br>Reverse- TCCGATAGGTCTGTGGCTGGAA |
| <i>Phkg1</i>                   | Forward- GCTCACAGACTTCGGGTTTTCC                                     |

|                        |                                    |
|------------------------|------------------------------------|
|                        | Reverse- ATGTCCACCTCCTTCCCATAGC    |
| <i>Phkg2</i>           | Forward- ACCCAGGCTATGGCAAGGAAGT    |
|                        | Reverse- TGCGTAGCATCAGGATTGGCG     |
| <i>Gbe1</i>            | Forward- CTCTGTTCTCCAACCTCCCAGG    |
|                        | Reverse- CAAGGTAGCGTCGATTGGTGAG    |
| <i>Complex I (ND1)</i> | Forward- CAGGATGAGCCTCAAACCTCC     |
|                        | Reverse- GGTCAGGCTGGCAGAAAGTAA     |
| <i>Complex I (ND2)</i> | Forward- AGGGATCCCCTGACACATAG      |
|                        | Reverse- CCTATGTGGGCAATTGATGA      |
| <i>Complex II</i>      | Forward- ACAAATGGTCTCTTCCTATGGCA   |
|                        | Reverse- CCCCTCCACTCAAGGCTATTC     |
| <i>Complex III</i>     | Forward- ACGTCCTTCCATGAGGACAA      |
|                        | Reverse- GAGGTGAACGATTGCTAGGG      |
| <i>Complex IV (1A)</i> | Forward- CTTTTATCCTCCCAGGATTGG     |
|                        | Reverse- GCTAAATACTTTGACACCGG      |
| <i>Complex IV (5A)</i> | Forward- CTTTAAATGAATTGGGAATCTCCAC |
|                        | Reverse- GCCCATCGAAGGGAGTTTACA     |
| <i>Complex V</i>       | Forward- AATTACAGGCTTCCGACACAAAC   |
|                        | Reverse- TGGAATTAGTGAAATTGGAGTTCCT |
| <i>GAPDH</i>           | Forward- CCTCGTCCCGTAGACAAA        |
|                        | Reverse- AATGAAGGGGTCGTTGATG       |

---

Abbreviations: CYP1A2, Cytochrome P450 1A2; CYP3A4, Cytochrome P450 3A4; IL-1 $\beta$ ,

Interleukin-1 $\beta$ ; TNF- $\alpha$ , Tumor necrosis factor- $\alpha$ ; IL-6, Interleukin-6; Aco1, Aconitase 1; Aco2, Aconitase 2; Mdh1, Malate dehydrogenase 1; Mdh2, Malate dehydrogenase 2; Pygl, glycogen phosphorylase; Phkg1, Phosphorylase kinase catalytic subunit gamma 1; Phkg2, Phosphorylase kinase catalytic subunit gamma 2; Gbe1, glycogen branching enzyme 1; GAPDH, Glyceraldehyde 3-phosphate dehydrogenase
